# Supplementary material
Source: ML conference proceedings conference paper supplement (https://proceedings.mlr.press/v33/qian14.html)
Supplement: Supplementary file [file qian14-supp.pdf]

## 6 Supplementary

### Proof of Lemma 1:

*Proof.* In the 2-step procedure of Algorithm 1,  $S_0$  is obvious the optimal solution to the sub-problem with parameter  $|S_0|$ , that is,  $S_0 = S(|S_0|)$ . Then for the second model selection step,  $S_0 = S^*$  due to global optimality of  $S_0$ .  $\square$

To prove Thm.3, we need the following Finsler's lemma.

**Lemma 8.** (*Finsler*) Let  $x \in \mathbb{R}^n$ ,  $B \in \mathbb{R}^{m \times n}$  and  $Q \in \mathbb{R}^{n \times n}$  such that  $\text{rank}(B) < n$ ,  $Q$  symmetric and positive semi-definite. Then the following two statements are equivalent:

$$x'Qx > 0, \forall x \neq 0, Bx = 0 \iff \exists \gamma > 0 : Q + \gamma B'B \succ 0. \quad (19)$$

### Proof of Thm.3:

*Proof.* Assume w.l.o.g. that  $S = \{1, 2, \dots, k\}$  consists of the first  $k$  nodes. Then  $A \circ M$  exactly captures the adjacency matrix of the induced sub-graph:

$$A \circ M = \begin{pmatrix} A_S & 0 \\ 0 & 0 \end{pmatrix} \quad (20)$$

In the fashion,  $\text{diag}((A \circ M)\mathbf{1}_n) - (A \circ M)$  captures the Laplacian matrix of  $S$ :

$$\text{diag}((A \circ M)\mathbf{1}_n) - (A \circ M) = \begin{pmatrix} L_S & 0 \\ 0 & 0 \end{pmatrix}. \quad (21)$$

By Lemma 2 and Rayleigh-Ritz theorem, we want the following to hold on  $L_S$ :

$$x' L_S x > 0, \forall 0 \neq x \in \mathbb{R}^k, x' \mathbf{1}_k = 0. \quad (22)$$

By Lemma 8, the above condition can be converted into:

$$L_S + \gamma \mathbf{1}_k \mathbf{1}_k' \succeq \epsilon I_k, \quad (23)$$

where  $\gamma k \geq \epsilon$ . Now we place this LMI back to the large matrix and notice the fact that:

$$\text{diag}(M\mathbf{1}_n) = \begin{pmatrix} kI_k & 0 \\ 0 & 0 \end{pmatrix}, \quad (24)$$

the equivalent LMI for the large matrix is:

$$\text{diag}((A \circ M)\mathbf{1}_n) - (A \circ M) + \gamma M \succeq \frac{\epsilon}{k} \text{diag}(M\mathbf{1}_n), \quad (25)$$

where  $\gamma k \geq \epsilon$  should be satisfied. Let  $\epsilon = \gamma k$ , and the proof is done.  $\square$

### Proof of Corollary 4:

*Proof.* Let  $\gamma = \lambda_2(\Lambda_k)/k$ . Then every  $S$  satisfying  $Q(M; \gamma) \succeq 0$  and  $\text{diag}(M)\mathbf{1}_n = k$  is connected by Thm.3 and of size  $k$ . So  $S \in \Lambda_k$ .

On the other hand, for any  $S \in \Lambda_k$ ,  $\lambda_2(S) \geq \lambda_2(\Lambda_k) \geq \gamma k$ . From the proof of Thm.3, the indicator matrix  $M$  corresponding to  $S$  satisfies  $Q(M; \gamma) \succeq 0$  and  $\text{diag}(M)\mathbf{1}_n = k$ . Proof is done.  $\square$

### Proof of Lemma 5:

*Proof.* If  $M \in \{0, 1\}^{n \times n}$ , by constraints of Eq.(10),  $M_{ij} = 1$  if and only if  $M_{ii} = 1$  and  $M_{jj} = 1$ . Thus  $M = \text{diag}(M)\text{diag}(M)'$  is rank-1.

On the other hand, if  $M$  is rank-1, or  $M = ff'$ , . Consider any two non-zero entries of  $f$ :  $f_i = a \neq 0$ ,  $f_j = b \neq 0$ . Then by  $M_{ij} \leq \min\{M_{ii}, M_{jj}\}$ , we have  $a = b$ . So every non-zero entry of  $f$  is equal. The node with  $M_{ii} = 1$  ensures that all non-zero entries of  $f$  is 1. Proof is done.  $\square$

**Proof of Theorem 6:**

*Proof.* For part (a), assume on the contrary that the support of  $\text{diag}(M)$  is disconnected:  $S = C \cup \bar{C}$ , where  $\bar{C} = S - C$ . Let  $|S| = k$ ,  $|C| = k_1$ ,  $|\bar{C}| = k_2$ . W.l.o.g. assume  $M_{11} = 1$ , and  $C$  consists of nodes  $\{1, 2, \dots, k_1\}$ .

Consider the  $k \times k$  sub-matrix  $Q_S$  of  $Q$  corresponding to  $S$ , since the rest part are all 0. Now we use the vector  $g = [\mathbf{1}_{k_1}; -\mathbf{1}_{k_2}]$  to hit  $Q_S$ :

$$g'Q_Sg = g'(\text{diag}((A_S \circ M_S)\mathbf{1}_n) - (A_S \circ M_S))g - \gamma g'(\text{diag}(M_S\mathbf{1}_n) - M_S)g \geq 0. \quad (26)$$

Note that  $A_S$  has the form:

$$A_S = \begin{pmatrix} A_C & 0 \\ 0 & A_{\bar{C}} \end{pmatrix}, \quad (27)$$

where the off-diagonal block is zero because by assumption  $C$  and  $\bar{C}$  is disconnected. Then:

$$\text{diag}((A_S \circ M_S)\mathbf{1}_n) - (A_S \circ M_S) = \begin{pmatrix} \tilde{L}_C & 0 \\ 0 & \tilde{L}_{\bar{C}} \end{pmatrix}, \quad (28)$$

where  $\tilde{L}_C$  is the Laplacian matrix of  $C$  weighted by  $M_C$ . Notice it still holds that  $\tilde{L}_C\mathbf{1}_{k_1} = 0$ . This means  $g'(\text{diag}((A_S \circ M_S)\mathbf{1}_n) - (A_S \circ M_S))g = 0$ .

On the other hand, let  $\text{diag}(M_S\mathbf{1}_n) - M_S$  be:

$$\text{diag}(M_S\mathbf{1}_n) - M_S = \begin{pmatrix} L_1 & L_3 \\ L'_3 & L_2 \end{pmatrix}. \quad (29)$$

Using  $g_1 = [\mathbf{1}_{k_1}; 0]$  and  $g_2 = [0; \mathbf{1}_{k_2}]$  to hit  $Q_S$  will yield:  $\mathbf{1}'_{k_1}L_1\mathbf{1}_{k_1} = 0$  and  $\mathbf{1}'_{k_2}L_2\mathbf{1}_{k_2} = 0$ . Apparently  $g'(\text{diag}(M_S\mathbf{1}_n) - M_S)g \geq 0$  due to positive semi-definiteness of Laplacian matrix. If it's strictly positive, proof is done. Otherwise this means  $\mathbf{1}'_{k_1}L_3\mathbf{1}_{k_2} = 0$ . Note that all entries of  $L_3$  are either 0 or negative due to non-negativity of  $M_S$ . This means  $L_3 = 0$ , or equivalently  $M_{ij} = 0$  for any  $i \in C, j \in \bar{C}$ . But this can not happen, because  $M_{11} = 1$  and  $M_{1j} \geq 1 + M_{jj} - 1 = M_{jj} > 0$  for any  $j \in \bar{C}$ . Contradiction!

Part (b) is straightforward by using  $g = \mathbf{1}_C - \mathbf{1}_{\bar{C}}$  to hit  $Q_S$ . Proof is done.  $\square$

**Proof of Proposition 7:**

*Proof.* The proof is similar to the proof of Thm.6, by using  $g = \mathbf{1}_{C_1} - \mathbf{1}_{C_2}$  to hit  $Q$ .  $\square$
